# Supplementary material for: Nutrient Deprivation Coupled with High Light Exposure for Bioactive Chrysolaminarin Production in the Marine Microalga Isochrysis zhangjiangensis
Source: MDPI journal article supplement (doi:10.3390/md20060351), 2022-05-26
Supplement: s1 [file s1]

**Table S1** Composition of different nutrient-deficient medium

| Component                            | Final concentration in the growth medium |            |            |            |
|--------------------------------------|------------------------------------------|------------|------------|------------|
|                                      | NR                                       | -N         | -P         | -S         |
| NaNO <sub>3</sub>                    | 600 mg/L                                 | -          | 600 mg/L   | 600 mg/L   |
| NaH <sub>2</sub> PO <sub>4</sub>     | 20 mg/L                                  | 20 mg/L    | -          | 20 mg/L    |
| Na <sub>2</sub> SiO <sub>3</sub>     | 30 mg/L                                  | 30 mg/L    | 30 mg/L    | 30 mg/L    |
| FeCl <sub>3</sub> ·6H <sub>2</sub> O | 3.15 mg/L                                | 3.15 mg/L  | 3.15 mg/L  | 3.15 mg/L  |
| EDTA·2Na·                            | 4.36 mg/L                                | 4.36 mg/L  | 4.36 mg/L  | 4.36 mg/L  |
| CuCl <sub>2</sub>                    | 8.2 µg/L                                 | 8.2 µg/L   | 8.2 µg/L   | 8.2 µg/L   |
| Na <sub>2</sub> MoO <sub>4</sub>     | 6.3 µg/L                                 | 6.3 µg/L   | 6.3 µg/L   | 6.3 µg/L   |
| ZnCl <sub>2</sub>                    | 21 µg/L                                  | 21 µg/L    | 21 µg/L    | 21 µg/L    |
| CoCl <sub>2</sub> ·6H <sub>2</sub> O | 0.01 mg/L                                | 0.01 mg/L  | 0.01 mg/L  | 0.01 mg/L  |
| MnCl <sub>2</sub> ·4H <sub>2</sub> O | 0.18 mg/L                                | 0.18 mg/L  | 0.18 mg/L  | 0.18 mg/L  |
| B <sub>12</sub>                      | 0.001 mg/L                               | 0.001 mg/L | 0.001 mg/L | 0.001 mg/L |
| B <sub>1</sub>                       | 0.2 mg/L                                 | 0.2 mg/L   | 0.2 mg/L   | 0.2 mg/L   |
| biotin                               | 0.001 mg/L                               | 0.001 mg/L | 0.001 mg/L | 0.001 mg/L |
| NaCl                                 | 21.22 g/L                                | 21.22 g/L  | 21.22 g/L  | 24.02 g/L  |
| NaHCO <sub>3</sub>                   | 0.174 g/L                                | 0.174 g/L  | 0.174 g/L  | 0.174 g/L  |
| MgCl <sub>2</sub> ·6H <sub>2</sub> O | 9.034 g/L                                | 9.034 g/L  | 9.034 g/L  | 9.034 g/L  |
| CaCl <sub>2</sub>                    | 1.033 g/L                                | 1.033 g/L  | 1.033 g/L  | 1.033 g/L  |
| Na <sub>2</sub> SO <sub>4</sub>      | 3.407 g/L                                | 3.407 g/L  | 3.407 g/L  | -          |
| KCl                                  | 0.357 g/L                                | 0.357 g/L  | 0.357 g/L  | 0.357 g/L  |
| KBr                                  | 0.0862 g/L                               | 0.0862 g/L | 0.0862 g/L | 0.0862 g/L |
| H <sub>3</sub> BO <sub>3</sub>       | 0.023 g/L                                | 0.023 g/L  | 0.023 g/L  | 0.023 g/L  |

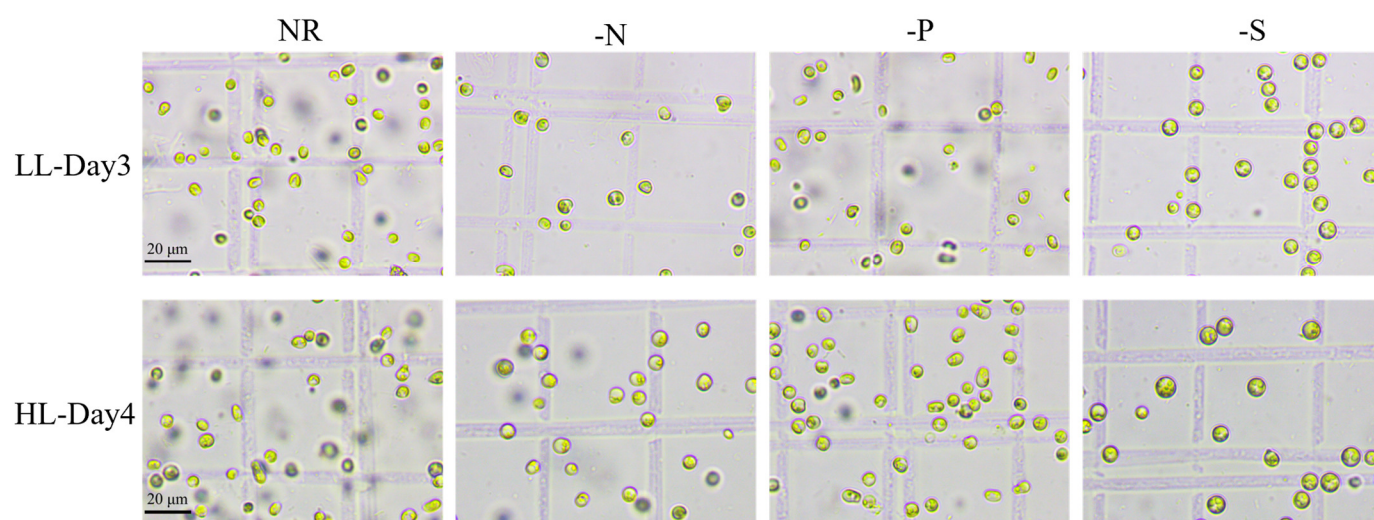

**Figure S1.** Cell morphology of *Isochrysis zhangjiangensis* cultivated with different nutrient deprivations (NR, nutrient repletion; -N, nitrogen deprivation; -P, phosphorus deprivation; -S, sulfur deprivation) under low light (LL) and high light (HL) intensities
